# Supplementary material for: Opioids and Sickle Cell Disease: From Opium to the Opioid Epidemic
Source: MDPI journal article supplement (doi:10.3390/jcm10030438), 2021-01-23
Supplement: s1 [file s1]

**Table 1. S. Equianalgesic dosing equivalents of opioids in opioid naïve patients.**

|                                  | Potency  | Equianalgesic Doses |                 |
|----------------------------------|----------|---------------------|-----------------|
|                                  | y        |                     |                 |
| Drug                             | i.v./p.o | i.v.                | p.o. (mg)       |
|                                  | .        | (mg)                |                 |
| <i>Agonists</i>                  |          |                     |                 |
| Morphine                         | 3        | 10                  | 30*             |
| Hydromorphone                    | 5        | 1.5                 | 7.5+            |
| Meperidine                       | 4        | 75                  | 300             |
| Levorphanol                      | 2        | 2                   | 4               |
| Fentanyl                         | NA       | 0.1                 | NA              |
| Sufentanil                       | NA       | 0.02                | NA              |
| Methadone                        | 2        | 5                   | 10**            |
| Codeine                          | 1.5      | 120-130             | 200             |
| Oxycodone (p.o.)                 | NA       | NA                  | 20              |
| Propoxyphene                     | NA       | NA                  | 130             |
| (p.o.) <sup>††</sup>             |          |                     |                 |
| Oxymorphone                      | 10       | 1                   | 10 <sup>†</sup> |
| Hydrocodone                      | NA       | NA                  | 30              |
| <i>Partial agonist</i>           |          |                     |                 |
| Buprenorphine                    | NA       | 0.3-0.4             | NA              |
| Dezocine <sup>°</sup>            | NA       | 10                  | NA              |
| <i>Mixed agonist-antagonists</i> |          |                     |                 |
| Pentazocine                      | 3        | 60                  | 180             |
| Nalbuphine                       | NA       | 10                  | NA              |
| Butorphanol                      | NA       | 2                   | NA              |

\* 60mg for single dose.

<sup>†</sup>Hydromorphone rectal is 3mg and Oxymorphone rectal is 10mg.

<sup>††</sup>Propoxyphene and all combination drugs containing it were withdrawn by the FDA in 2010 and other countries are doing the same. Readers are advised to check its status in their countries.

<sup>°</sup>Dezocine is not available in the United States and Canada. However, in China, it is used after surgery.

Adapted from Ballas, S.K. *Sickle Cell Pain, 2nd Edition*; International Association for the Study of Pain: Washington DC, 2014.
